# Supplementary material
Source: publisher figshare collection journal article supplement (https://acs.figshare.com/ndownloader/files/4653421)

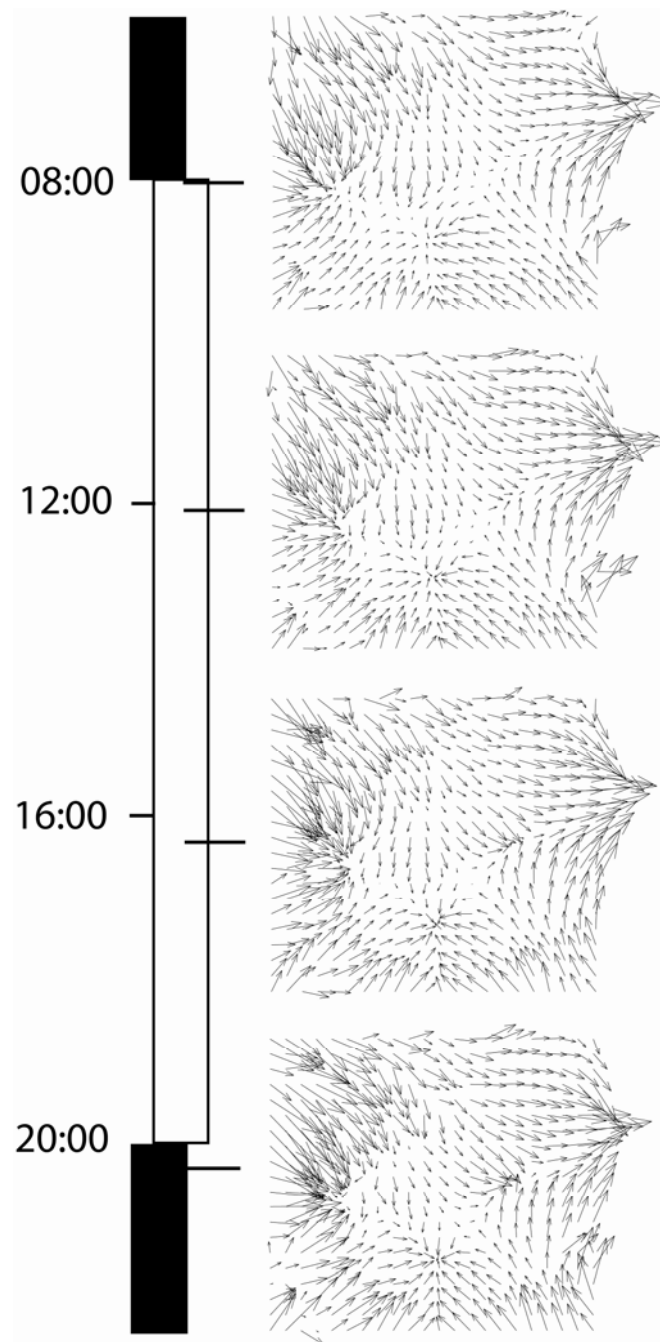

**Supplementary Figure 6** The development of flow patterns close to roots during the light period.

Supplement: Supplementary file 1 [file 4653421]
